# Supplementary material for: Inhibition of VCP modulates NF-κB signaling pathway to suppress multiple myeloma cell proliferation and osteoclast differentiation
Source: publisher site journal article supplement (doi:10.18632/aging.204965), 2023-08-21
Supplement: Supplementary file [file aging-v15i16-204965-supplementary-material-SD1.pdf]

SUPPLEMENTARY FIGURES

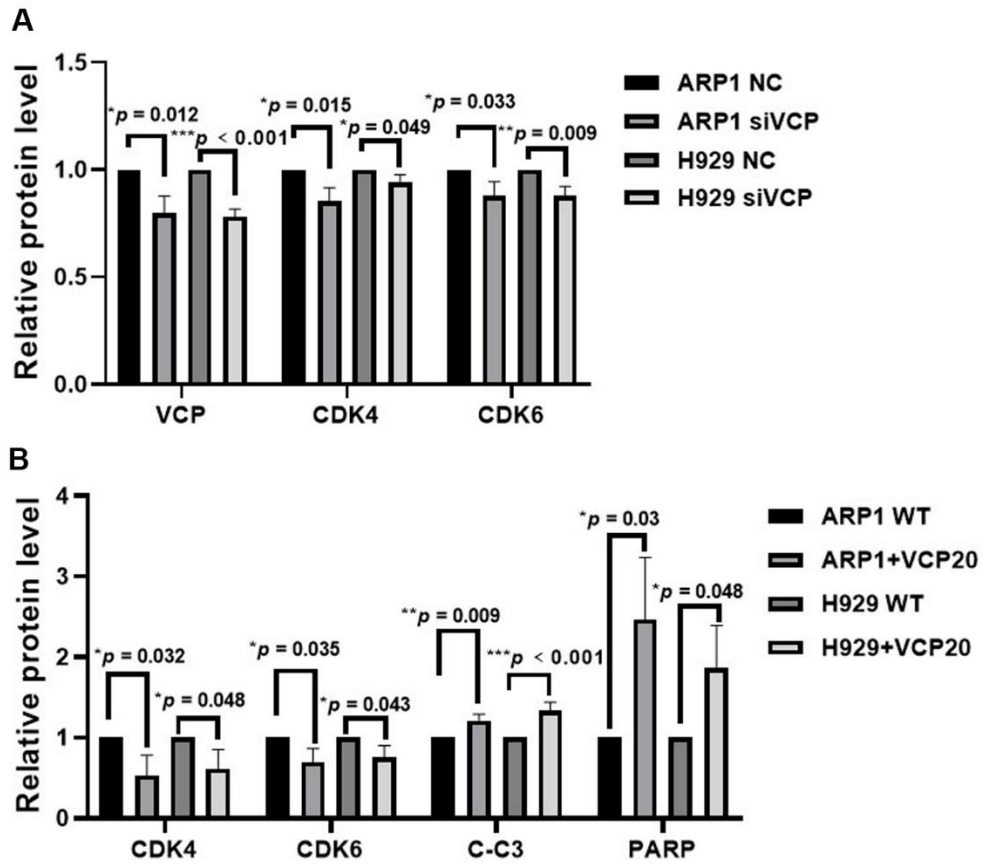

**Supplementary Figure 1. Quantitative analysis of WB results.** (A) Quantitative analysis of VCP, CDK4, and CDK6 expressions in siVCP and NC cells. (B) Quantitative analysis of CDK4, CDK6 C-C3 and PARP expressions in cells treated with VCP20. The data are expressed as mean  $\pm$  SD. (\* $p < 0.05$ ; \*\* $p < 0.01$ ; \*\*\* $p < 0.001$ ). Related to Figures 1D, 1F, 2E, 2F in the manuscript.

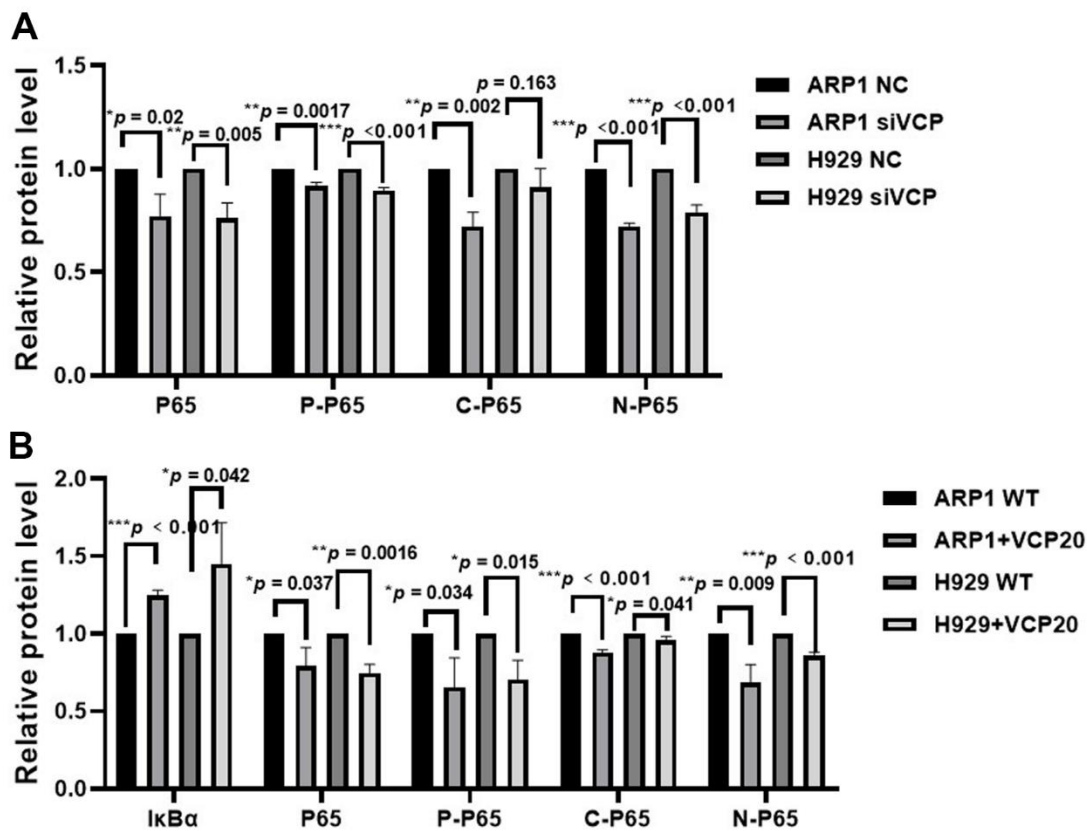

**Supplementary Figure 2. Quantitative analysis of WB results.** (A) Quantitative analysis of P65, P-P65, C-P65 and N-P65 expressions in siVCP and NC cells. (B) Quantitative analysis of IκBα, P65, P-P65, C-P65 and N-P65 expressions in cells treated with VCP20. The data are expressed as mean ± SD. (\* $p < 0.05$ ; \*\* $p < 0.01$ ; \*\*\* $p < 0.001$ ). Related to Figure 3C–3E in the manuscript.

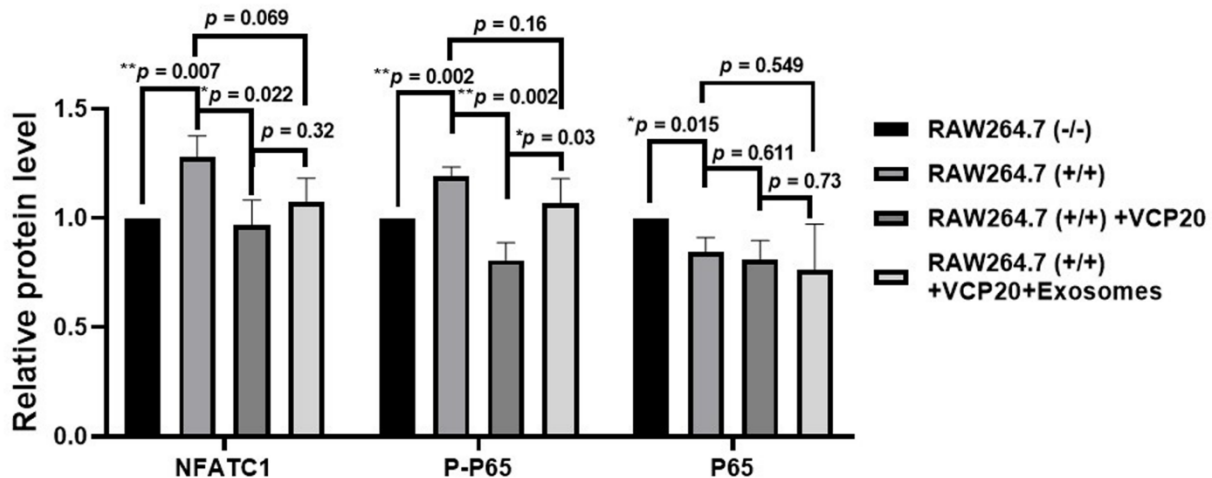

**Supplementary Figure 3. Quantitative analysis of NFATC1, P-P65 and P65 expressions in RAW264.7 cells treated with RANKL/M-CSF, VCP20, Exosomes or not.** The data are expressed as mean ± SD. (\* $p < 0.05$ ; \*\* $p < 0.01$ ). Related to Figure 4H in the manuscript.
